## Synthesis of zinc chloride activated eco-friendly nano-adsorbent (activated carbon) from food waste for removal of pollutant from biodiesel wash water

A. Santhosh<sup>a</sup> and S. S. Dawn<sup>a,b,\*</sup>

<sup>a</sup> Centre of Excellence for Energy Research, Sathyabama Institute of Science and Technology, Chennai 600119, India

<sup>b</sup> Center for Waste Management, Sathyabama Institute of Science and Technology, Chennai 600119, India

\*Corresponding author. E-mail: dawnsudha@yahoo.com

### ABSTRACT

Food waste has been a complex component added to municipal solid waste, making it a major reason for the evolution of greenhouse gases, foul odour and a dwelling habitat for insects and microbes. Diversion of the mixed food waste (unsegregated) to useful materials (activated carbon) would have immense industrial significance. In this study, rice, vegetables, oil and spice (WCVR); mixed fruit peels including banana peel, pomegranate peel, orange peel and lemon peel (MFPW); plain rice (WCR) and mixed food waste (rice, dhal, vegetables, fruits, meat and bones) (MFW) were used. Food waste samples were heated at a temperature of 350 °C for 3 h in an incinerator and then activated with zinc chloride for 2 h in a muffle furnace maintained at 500–600 °C temperature. Zinc chloride activated carbon was characterized through X-ray diffraction, field emission scanning electron microscopy and fourier transform infrared spectroscopy. WCR carbon was the best-activated carbon, yielding nanomaterials with  $2\theta = 25.81, 31.76, 34.41$  and  $56.54$ , which was in accordance with the JCPDS card number. The MFW activated carbon reduced the biodiesel wash water pH from 10 to 6.5 making it suitable for recycling. Turbidity was reduced by 98.41%, chemical oxygen demand by 41.33%, oil and grease by 99.05% for MFW carbon.

**Key words:** activated carbon, biodiesel wash water, food waste, nanomaterial, turbidity

### HIGHLIGHTS

- Biodiesel wastewater was generated enormously during biodiesel synthesis.
- Food waste was converted to activated carbon (AC) and activated with zinc chloride.
- Synthesized AC had high intensity peaks at  $31.9^\circ$ ,  $34.5^\circ$  and  $36.5^\circ$ .
- 0.5 g AC reduced turbidity, COD, oil and grease by 98.41, 41.33 and 99.05%.

## GRAPHICAL ABSTRACT

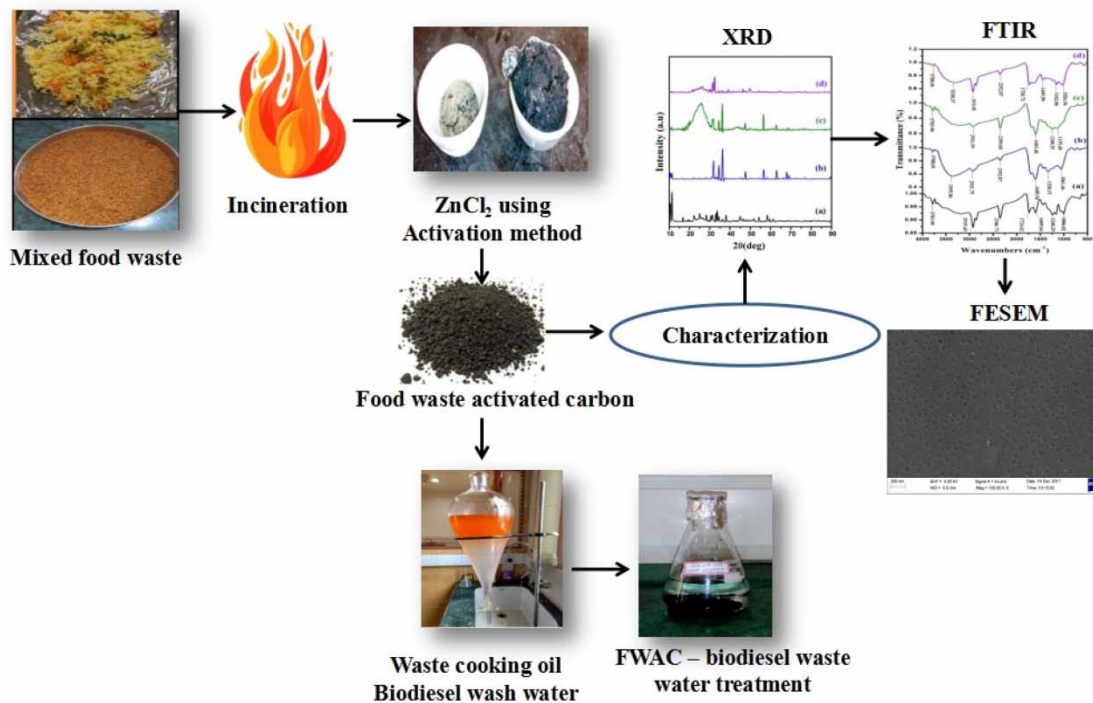

## 1. INTRODUCTION

Food waste generation was around 1.4 billion tons per year in developing countries (Giroto *et al.* 2015; Kosheleva *et al.* 2019; Tucho & Okoth 2020). This may be attributed to the lack of awareness of the value of food, food security, poverty and societal wellbeing. Food waste when mixed with municipal solid waste results in stale odours from the waste dump yards contributing to secondary pollution. Food waste is rich in carbon-based materials, which can be processed through appropriate techniques for value-added products recovery (Joshi 2002; Pandey *et al.* 2016). Many investigators have processed food waste through anaerobic digestion to synthesize biogas ( $\text{CO}_2$ ,  $\text{CH}_4$ ), a green fuel for rural livelihoods (Cho *et al.* 1995). Although biogas production is the most popular utility for food waste, excess availability of food waste, lack of popularization of biogas application as a replacement to conventional cooking fuels and need for location-specific biogas plant installations in proximity to where the food waste is generated, needs private interest and remains a challenge that has led to the idea of developing a mechanism to divert a percentage of food waste to activated carbon. In larger communities (apartments, hostels, mansions, industries, etc), the food waste can be reduced through connected home techniques via smart mobile applications by providing ideas towards inventory management and cooking skills (Tavill 2020).

Food waste is converted to activated carbon via pyrolysis, hydrothermal carbonization, etc. This has emerged as a hot topic in the current scenario among environmental researchers working on industrial wastewater remediation. Food waste-based activated carbon possesses numerous advantages like less cost, enormous resource availability, etc. The best activated agent for the potential of activated carbon produced to adsorb various adsorbates from aqueous solutions are electrocoagulation (Chavalparit & Ongwandee 2009), coagulation, adsorption (Pitakpoolsil & Hunsom 2013), biological processes and microbial fuel cell systems. Adsorption is one of the most effective methods used for the treatment of wastewater from different sources (Halim *et al.* 2012; Bashir *et al.* 2015; Azmi *et al.* 2016). The use of activated carbon (AC) as an adsorbent was considered as one of the most efficient technologies for the removal of colorants, organic pollutants, chemical oxygen demand (COD), and heavy metals (Li *et al.* 2009). Activated carbon is highly porous in nature and has a wide range of practical applications because of its versatile adsorption capacity (Dabwan *et al.* 2015). Researchers around the globe have utilized bamboo, peach stones, grass, wood, agricultural wastes like coir pith, peanut hull, rice husk, palm trees, palm

stones, fruit peel, sugar beet pulp, grain sorghum, wheat husk and industrial wastes for the synthesis of activated carbon (Yalcin & Sevinc 2000; Ramakrishnan & Namasivayam 2009; Abdul-Hameed & Al-Juboury 2020a, 2020b).

Activated carbon (AC) from materials has been preferably synthesized by chemical (Kumar & Jena 2016; Tran *et al.* 2018) or physical methods over recent years (Guan *et al.* 2013; Enaime *et al.* 2017). Chemical activation of carbonaceous material with  $\text{ZnCl}_2$  has resulted in 70% of adsorption capacity compared with activated carbon produced using other agents (Mahamad *et al.* 2015). Surface and structural analyses of activated carbon is the most important and essential property to be analyzed to decide its commercial applications (Dizbay-Onat *et al.* 2018; Inbaraj *et al.* 2021). Several researchers have attempted to use homogeneous food waste generated from processing raw materials, to be diverted for activated carbon synthesis (Dhandapani *et al.* 2020; Yang *et al.* 2021). This reported study was taken up to investigate the effect of four different food waste samples generated routinely into  $\text{ZnCl}_2$  incorporated activated carbon for the treatment of biodiesel wash water, to evaluate its efficiency for the removal of turbidity and reduction of pH.

Water scarcity and treatment regimes in various sectors including biodiesel production, dyeing industries, electroplating, etc., are emerging from research around the globe (Baldev *et al.* 2018; MubarakAli 2019). Transesterification processes generate a huge amount of wash water (wastewater) during the biodiesel production owing to the wet washing step (Chung *et al.* 2019; Poornapushpakala *et al.* 2021). Biodiesel wash water will be alkaline in nature with pH above 9 (Mustafa & Asmatulu 2020). Wash water reuse will reduce the dependence of biodiesel industries on freshwater resources and will decrease the amount spent on freshwater requirements during wet washing.

The study was extended further to synthesize a heterogeneous food waste  $\text{ZnCl}_2$  activated carbon, to eliminate the process of segregation of food waste into homogeneous food waste samples, thereby reducing the investment of time and money on segregation. Food waste activated carbon is reported as a novel adsorbent efficient in treating highly turbid, strongly alkaline wastewater including biodiesel wash water. Also, this will be a first-time attempted mechanism in which mixed food waste (MFW) of maximum heterogeneity generated, can be diverted indigenously towards activated carbon synthesis, contributing to a sustainable approach for recycling food waste which would otherwise become an added source of organic pollution when dumped on landfills.

## 2. EXPERIMENTAL METHODS

### 2.1. Materials and chemicals

Food waste was collected from the Sathyabama Institute of Science and Technology Chennai, Tamil Nadu, India that has a mess hall, catering to about 12,000 people every day and hence is identified as a potential source for food waste collection. Zinc chloride ( $\text{ZnCl}_2$ ) with purity >98% was purchased from Fisher Scientific Mumbai and an incinerator (model A1500 150\* 100 \* 96 cm Italy) was used.

### 2.2. Collection of food waste and analysis

Four different food wastes namely rice, vegetables, oil and spice (WCVR); mixed fruit peels including banana peel, pomegranate peel, orange peel and lemon peel (MFPW); plain rice (WCR) and mixed food waste containing rice, dhal, vegetables, fruits, meat and bones (MFW) were collected in plastic buckets and subjected to proximate studies as per ASTM International D3,173–3,175 test standards.

### 2.3. Preparation of activated carbon from food waste

The collected food waste samples were dried for 8 h in sunlight to remove moisture and subsequently oven dried at 105 °C for 4–5 h to remove remaining bound moisture. The waste samples were heated at 350 °C for a time of 3 h in an incinerator (model A1500 150\* 100 \* 96 cm Italy) to convert the dried food waste into carbon. Furthermore, the dried carbonaceous food waste samples were size reduced using a ball mill (SPEX 8000M-230 dual mixer mill, 230 V/50 Hz USA) for 15 min and sieved through a 40-mesh screen. The synthesized carbon powder was doped in 1 N  $\text{ZnCl}_2$  solution in the ratio 1 g:2 mL for 2 h at 80 °C (Saqib *et al.* 2018). The  $\text{ZnCl}_2$ -doped carbon samples were further activated at 500–600 °C in a muffle furnace for 2 h. The activated samples were size reduced with a pestle and mortar to produce fine activated carbon. The activated carbon samples were then washed with distilled water to reduce the pH to neutral. The washed activated carbon samples were dried in a hot air oven at 110 °C for 2 h and crushed to produce the activated carbon. The procedure was carried out for all four food waste samples collected.

#### 2.4. Characterization of food waste carbon

The ZnCl<sub>2</sub> activated carbon samples obtained from food waste samples WCVR, MFPW, WCR and MFW were characterized for their crystalline or amorphous nature, surface morphology and presence of functional groups using X-ray diffraction (XRD), field emission scanning electron microscopy (FESEM) and Fourier transform-infrared spectroscopy studies. The XRD technique was used to examine the crystalline and non-crystalline nature of the material. XRD was performed using an analytical D/Max-2500 X-ray diffractometer equipped with Cu-K $\alpha$  radiation (1.5406 Å) operating at 40 kV, 50 mA in the 2 $\theta$  range of 20°–80° with scanning rate of 0.02 S<sup>-1</sup>. Thus, phase analysis and the nature of activated carbon were confirmed using XRD. FESEM images were taken to investigate the surface morphology of the activated carbon using an SEM: Carl Zeiss (SUPRA 55, Germany) by field emission scanning electron microscopy. Furthermore, the surface carbon–oxygen functional groups present in samples were identified by performing FTIR measurements using the KBr method by FTIR – Fourier transform infrared spectroscopy (ALPHA FTIR Spectrometer, Bruker). FTIR studies were carried out between 4,000 and 500 cm<sup>-1</sup> for all the samples.

#### 2.5. Preparation of biodiesel wash water from waste cooking oil

Here, 50 L waste cooking oil (WCO) was collected from the mess hall facility at Sathyabama Institute of Science and Technology, Tamil Nadu, India. The free fatty acid (FFA) content of the collected WCO was tested as per ASTM D664. The FFA content was determined using a sodium hydroxide (NaOH) titration method. The WCO was transesterified using methanol 1:3 molar ratio and NaOH as a catalyst for a time of 90 min in a 100 L capacity biodiesel pilot plant established at the Centre for Waste Management, Sathyabama Institute of Science and Technology, Chennai, Tamil Nadu, India. Biodiesel was separated from the byproduct (crude glycerol) after a settling time of 8 h at room temperature. Later the biodiesel was collected and subjected to wet washing (Ranjan *et al.* 2018):

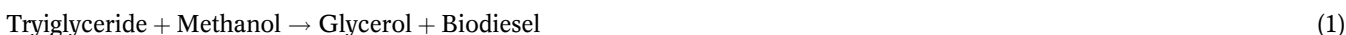

The collected biodiesel was washed with hot water at 60–80 °C for 15 min. Due to density difference, the washed biodiesel remained at the top allowing the wash water to settle at the bottom. The collected wash water was tested for its pH and the washing cycle was repeated until the pH of wash water collected became neutral (Nirmala *et al.* 2020). Depending on the quality of the WCO used as the raw material, the number of washing cycles varied from 3 to 5. Wash water generated during each cycle of washing was collected and used for adsorption studies.

#### 2.6. Adsorption studies

Here, 0.5 g of ZnCl<sub>2</sub> activated carbon was added to 100 mL of biodiesel wash water and agitated in a stoppered conical flask at constant speed of 120 rpm for 2 h. The mixture was filtered using a Whatman filter paper (110 mm). Wash waters after treatment with food waste activated carbon from all four samples (WCVR, MFPW, WCR and MFW) were analyzed as per standards (Wong *et al.* 2018) and their properties (pH, turbidity, COD, oil and grease) were determined.

### 3. RESULTS AND DISCUSSION

#### 3.1. Proximate analysis

The proximate analysis of the food waste samples are represented in Table 1. It was observed that the fixed carbon percentages of all samples fell between 22 and 32 comparable with the previously reported literature (Bashir *et al.* 2018) and were found to be suitable for activated carbon synthesis. It was observed that food waste with no rice content, comprising of only fruit peels (B) has a higher percentage fixed carbon, while for other samples fixed carbon was found to increase with increasing cooked rice percentage. The moisture content, ash content and volatile matter of the samples WCVR, MFPW, WCR, MFW were also comparable to the proximate composition (Saygılı *et al.* 2015). The samples WCVR, MFPW, WCR and MFW had 65.91%, 53.44%, 60.92% and 54.21% moisture content, 0.026%, 5.01%, 1.56% and 13.42% ash content, and 10.9%, 10.20%, 10.35% and 9.74% volatile content, respectively.

**Table 1** | Comparison of proximate analysis of collected food waste with previously published literature

| Sample        | Moisture content (%) | Ash content (%) | Volatile mater (%) | Fixed carbon (%) | References                 |
|---------------|----------------------|-----------------|--------------------|------------------|----------------------------|
| WCVR          | 65.91                | 0.026           | 10.19              | 23.86            | In this study              |
| MFPW          | 53.44                | 5.01            | 10.20              | 31.346           |                            |
| WCR           | 60.92                | 1.56            | 10.35              | 27.17            |                            |
| MFW           | 54.21                | 13.42           | 9.74               | 22.62            |                            |
| Food waste    | 60.9                 | 1.61            | 80.9               | 11.4             | Chen <i>et al.</i> (2019a) |
| Food waste    | 74                   | 1.15            |                    | 24.85            | Chen <i>et al.</i> (2019b) |
| Food waste    | 76.5                 | 6.4             | 79.1               | 14.5             | Saqib <i>et al.</i> (2018) |
| Kitchen waste | 60–85                | 3.5–5.5         | –                  | 18–30            | Chang <i>et al.</i> (2006) |

WCVR, Kitchen waste (rice, vegetables, oil and spice); MFPW, Mixed fruit peels; WCR, Mess hall waste (plain rice); MFW, Mixed food waste (rice, dhal, vegetables, fruits, meat and bones).

## 3.2. Structural and surface characterization

### 3.2.1. X-ray diffraction (XRD) measurements

The X-ray diffraction technique was used to interpret the influence of  $\text{ZnCl}_2$  treatment on activating food waste carbon. Carbon powder was prepared for XRD analysis by grinding the required amount at  $80^\circ\text{C}$  for 2 h. The typical broad diffraction peak was obtained at  $22.3^\circ$  and  $42^\circ$  corresponding to (002) and (101) planes respectively. This indicated the presence of dominant amorphous phase (Figure 1). It is also noted that the XRD pattern of waste cooked rice (WCR) (Chingombe *et al.* 2005) showed a high intensity peak (002) with increased broadening without any secondary peaks which indicated that the carbon atoms existed in highly distorted manner compared with the other samples (Rajbhandari *et al.* 2012; Danish *et al.* 2018).

The diffraction pattern (Figure 2) of the  $\text{ZnCl}_2$  treated activated carbon samples confirmed the formation of ZnO which has absorbed on to the carbon surface after  $\text{ZnCl}_2$  treatment. The appearance of high intensity peaks at  $31.9^\circ$ ,  $34.5^\circ$  and  $36.5^\circ$  indicate the crystalline hexagonal phase of ZnO (JCPDS# 36-1451) as all the samples were dried at  $600^\circ\text{C}$  in an air atmosphere. The addition of  $\text{ZnCl}_2$  significantly affected the amorphous nature of the carbon phase as it can be seen that the intensity had changed for all the samples (Zięzio *et al.* 2020). Interestingly, the amorphous carbon peak had completely disappeared for cooked vegetable rice (WCVR) and the mixed fruit peel waste (MFPW) sample, whereas the amorphous peak still appeared for the WCR

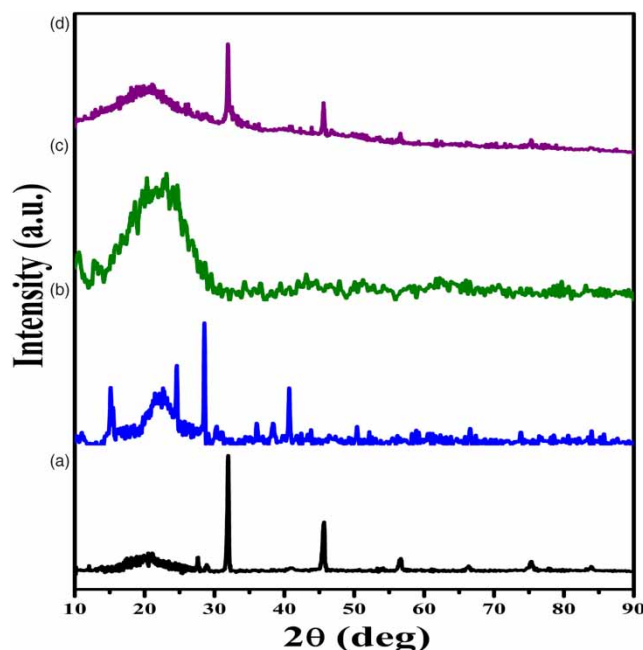**Figure 1** | XRD patterns of carbonaceous food waste samples before activation of WCVR (a), MFPW (b), WCR (c) and MFW (d).

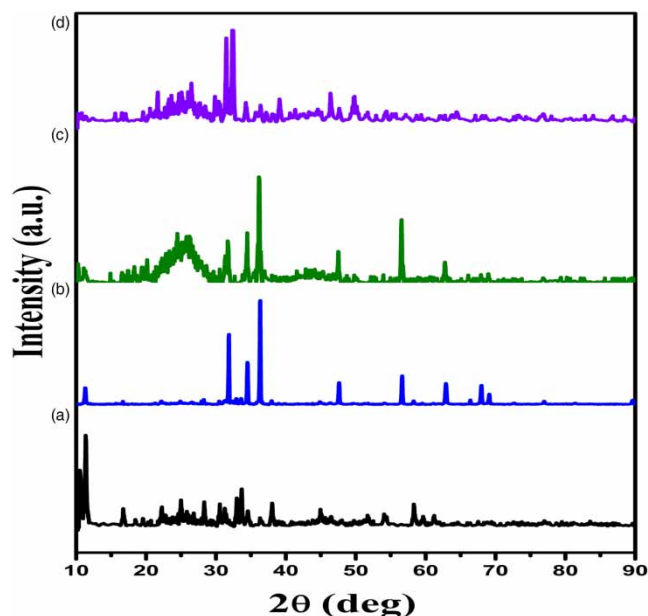

**Figure 2** | XRDs pattern of carbonaceous food waste samples after activation of WCVR (a), MFPW (b), WCR (c) and MFW (d).

and mixed food waste sample (MFW). The results strongly revealed that the  $\text{ZnCl}_2$  activation had stabilized the amorphous carbon phase in the WCR and mixed food waste sample (MFW). It was evident that the crystalline nature of carbon had improved in the  $\text{ZnCl}_2$  activated WCR sample compared with the untreated sample as reduced peak broadening is observed.

### 3.2.2. Field emission scanning electron microscopy (FESEM)

The surface morphology for adsorbents obtained from different food waste materials varied significantly. Specifically  $\text{ZnCl}_2$  activated adsorbent synthesized from rice was observed to have a mesoporous surface (Rajbhandari *et al.* 2012; Mokhtar *et al.* 2013) which is very important from the water treatment point of view and can handle wide ranges of pollutants including heavy metals, surfactants and high molecular weight organic pollutant (Mokhtar *et al.* 2013).  $\text{ZnCl}_2$  activation enhanced the stability and mesoporosity of the carbonaceous material and depicted the changes in surface morphology of carbonaceous samples after  $\text{ZnCl}_2$  activation (Figures 3 and 4). The activation process brought changes in the surface of the adsorbents. From the results, it is evident that  $\text{ZnCl}_2$  activation has been effective on waste rice as uniform pore (mesoporous) distribution was observed (Bae *et al.* 2014). Also, the FESEM data have been analyzed further and it was observed that the food waste-based activated carbon was 44.87 nm in size and the activated carbon synthesized from other food waste materials also had particles of size less than 100 nm, leading to the conclusion that the food waste carbonaceous materials yield nanoparticles upon  $\text{ZnCl}_2$  activation.

### 3.2.3. FTIR spectroscopy

Some important functional groups were identified in the synthesized activated carbon samples by FTIR spectroscopy as shown in Figure 5. It is evident that the peaks at  $1,006.02\text{ cm}^{-1}$ ,  $1,026.56\text{ cm}^{-1}$  are responsible for C-O stretching and  $2,346.71\text{ cm}^{-1}$ ,  $2,352.87\text{ cm}^{-1}$ ,  $2,359.03\text{ cm}^{-1}$  and  $3,783.90\text{ cm}^{-1}$ ,  $3,788.01\text{ cm}^{-1}$  for O-H stretching in esters (Yagmur *et al.* 2008). The peaks  $1,061.46\text{ cm}^{-1}$ ,  $1,320.15\text{ cm}^{-1}$ ,  $1,248.29\text{ cm}^{-1}$ ,  $1,139.48\text{ cm}^{-1}$  and  $1,162.06\text{ cm}^{-1}$  correspond to the C-N stretching in aliphatic amines and the peaks at  $3,395\text{ cm}^{-1}$  and  $3,338\text{ cm}^{-1}$  indicate the broad vibrational band caused by N-H stretching. The peak at  $1,724.62\text{ cm}^{-1}$  corresponds to the C = O stretching in ketones. The peaks at  $2,915.43\text{ cm}^{-1}$ ,  $2,921.75\text{ cm}^{-1}$  and  $2,931.85\text{ cm}^{-1}$  indicate the C-H stretching in alkanes. The  $1,603.48\text{ cm}^{-1}$ ,  $1,609.64\text{ cm}^{-1}$ ,  $1,605.54\text{ cm}^{-1}$  peaks indicate the C = C stretching in alkenes and the peak at  $1,449.50\text{ cm}^{-1}$  indicates the C = C stretching in aromatic compounds (Saka 2012; Jaria *et al.* 2019) (Figure 6). Indication of the decomposition of alkane and ester functional groups as the peaks in the spectral range around  $\sim 2,300\text{ cm}^{-1}$ – $3,000\text{ cm}^{-1}$  is not evident for all the samples (WCVR, MFPW, WCR, MFW). Most of the frequencies attributed to the activated carbon were absent and were mainly due to the existence of volatile organic compounds at an activation temperature in the range of  $500$ – $600\text{ }^\circ\text{C}$ . However, the observation of transmission peaks of  $\text{ZnCl}_2$  treated samples in the range  $\sim 1,000\text{ cm}^{-1}$ – $3,500\text{ cm}^{-1}$  may be attributed to the activated carbon samples attached to the surface groups bearing

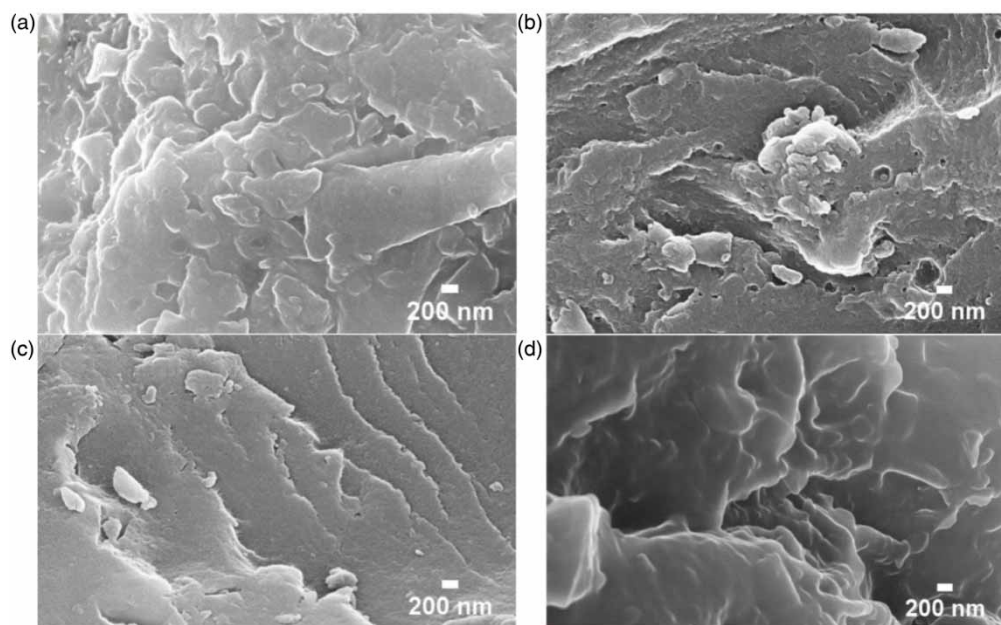

**Figure 3** | FESEM images of food waste samples before  $\text{ZnCl}_2$  activation of WCVR (a), MFPW (b), WCR (c) and MFW (d).

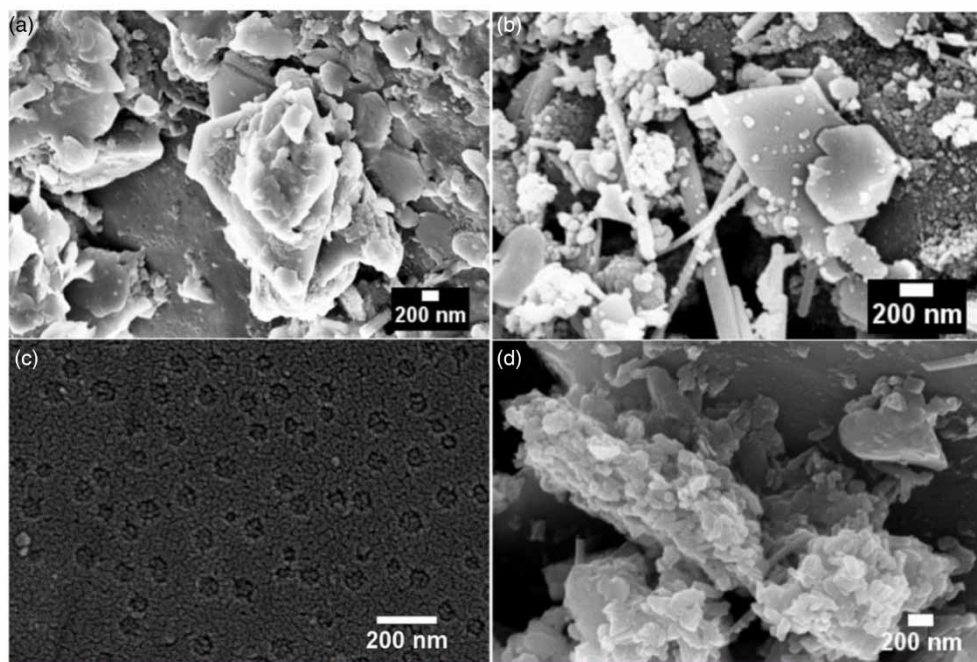

**Figure 4** | FESEM images of food waste samples after  $\text{ZnCl}_2$  activation of WCVR (a), MFPW (b), WCR (c) and MFW (d).

oxygen atoms on the aromatic and aliphatic backbone skeletons. The significant shifts of peaks between the samples may be predicted to be due to the interactions that originate from different activated functional groups (Ahmaruzzaman & Gupta 2011).

### 3.3. Biodiesel and wash water characterization

The moisture content, density, FFA, kinematic viscosity, resistance to corrosion, cloud and pour point, flash and fire point and calorific value of WCO were determined. Free fatty acid of WCO was found to be 0.11%, which helped in the choice of

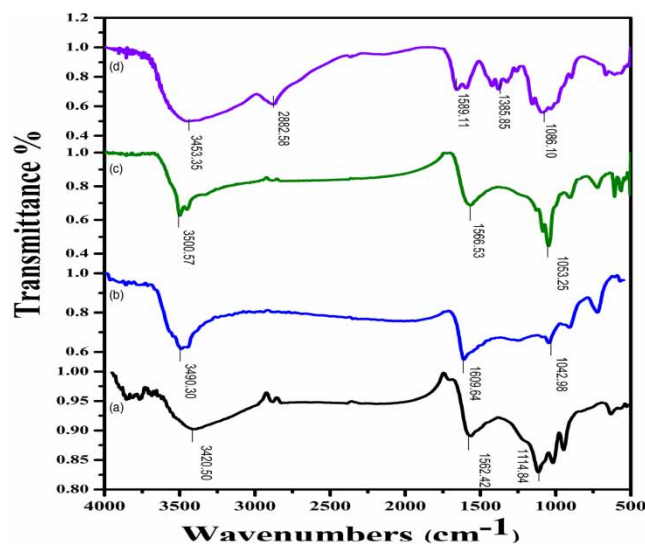

**Figure 5** | FTIR spectra of raw WCVR (a), MFPW (b), WCR (c) and MFW (d).

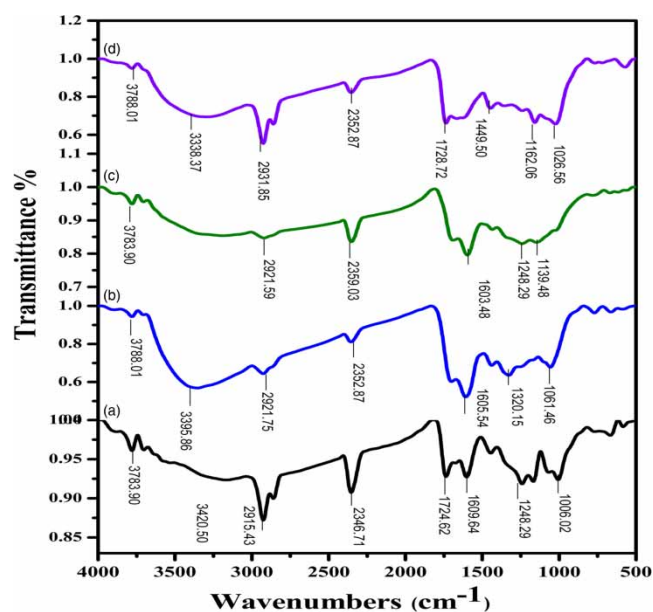

**Figure 6** | FTIR spectra of ZnCl<sub>2</sub> activated WCVR (a), MFPW (b), WCR (c) and MFW (d).

biodiesel production by the single stage transesterification process. Here, 1 mol of WCO was transesterified with 3 moles of methanol in the presence of alkali catalyst (5 g/L) at 60 °C for 90 min. Biodiesel yield was 97.3%, wash water formation after wet washing was 133 L and crude glycerol (byproduct) yield was 6.9 L. Density, kinematic viscosity and flash point of WCO before and after transesterification are given in Table 2. The properties were determined following ASTM International standards and it is evident that transesterification has yielded a fuel compatible to that used in diesel engines either in pure form or in blends. The collected wash water was characterized: a pH of 10, turbidity of 63 NTU, COD of 150 mg/L and oil and grease of 98 mg/L were determined.

### 3.4. Adsorption using food waste activate carbon samples

The pH, turbidity, COD, oil and grease of biodiesel wash water before and after treatment are listed in Table 3. It is evident that water quality parameters tested were reduced considerably by treatment with ZnCl<sub>2</sub> food waste activated carbon (Bashir *et al.* 2018), paving the way to carry out detailed investigations and optimization of adsorption conditions.



**Table 2** | Physiochemical properties of waste cooking oil and biodiesel

| Parameters                        | ASTM standards | WCO properties      | WCOBD properties             |
|-----------------------------------|----------------|---------------------|------------------------------|
| Density (g/cc)                    | ASTM D792      | 0.925               | 0.875                        |
| Kinematic viscosity @ 40 °C (cSt) | ASTM D445      | 9.38                | 2.18                         |
| Flash point by PMCC method (°C)   | ASTM D93       | 245                 | 189                          |
| Fire point by PMCC method (°C)    | ASTM D93       | 261                 | 202                          |
| Copper strip corrosion @60 °C     | ASTM D130      | 1a (slight tarnish) | 1a (slight tarnish)          |
| Cloud point (°C)                  | ASTM D2500     | 12                  | 8                            |
| Pour point (°C)                   | ASTM D2500     | 4                   | 2                            |
| Moisture content (%)              | ASTM D2709     | 2.6                 | 0.021                        |
| Acid value                        | ASTM D664      | 0.11%               | 0.218 mg NaOH/g of biodiesel |
| Calorific value (cal/g)           | ASTM D480913   | 9,598.5             | 8,522.978                    |

**Table 3** | Pollutant removal efficiency of food waste-based activated carbon from biodiesel washwater

| Source of activated carbon | pH       |            | Turbidity (NTU) |          |           | COD (mg/L) |           |           | Oil and Grease (mg/L) |              |           |
|----------------------------|----------|------------|-----------------|----------|-----------|------------|-----------|-----------|-----------------------|--------------|-----------|
|                            | Initial  | Final      | Initial         | Final    | % Removal | Initial    | Final     | % Removal | Initial               | Final        | % Removal |
| WCVR                       | 10 ± 0.1 | 7.2 ± 0.2  | 63 ± 0.008      | 1 ± 0.1  | 98.41     | 150 ± 0.18 | 91 ± 0.9  | 39.33     | 98 ± 0.2              | 0.938 ± 0.01 | 99.04     |
| MFPW                       | 10 ± 0.2 | 6.9 ± 0.3  | 63 ± 0.1        | 1 ± 0.23 | 98.41     | 150 ± 3    | 84 ± 0.3  | 44        | 98 ± 0.15             | 0.92 ± 0.08  | 99.06     |
| WCR                        | 10 ± 0.1 | 6.8 ± 0.15 | 63 ± 0.12       | 1 ± 0.2  | 98.41     | 150 ± 0.5  | 89 ± 0.23 | 40.66     | 98 ± 0.21             | 0.926 ± 0.02 | 99.05     |
| MFW                        | 10 ± 0.2 | 6.5 ± 0.21 | 63 ± 0.8        | 1 ± 0.3  | 98.41     | 150 ± 0.82 | 88 ± 0.36 | 41.33     | 98 ± 0.08             | 0.925 ± 0.01 | 99.05     |

WCVR, Kitchen waste (rice, vegetables, oil and spice); MFPW, Mixed fruit peels; WCR, Mess hall waste (plain rice); MFW, Mixed food waste (rice, dhal, vegetables, fruits, meat and bones).

pH is the measure of alkalinity or acidic nature of a solution. WHO in 1958 instructed that pH for domestic usage of water (drinking, washing, etc.) has to be 6.5–9.2. Later, the pH of commercial usage of water was changed to 6.5–8.5. In this study the effect of activated carbon on pH reduction of biodiesel wash water was explored with 100 mL of wash water, 0.5 g of activated carbon at time of 60 min and agitation at 150 rpm. From the results (Table 3), the pH of the wash water was reduced to 6.5 from 10 for the activated carbon produced from MFW. The pH of wash water was reduced to 7.2, 6.9 and 6.8 respectively when treated with activated carbon produced from other wastes (WCVR, MFPW, WCR) used in the study. Recently, ZnCl<sub>2</sub> incorporated activated carbon (3.2 g) produced from wastepaper and cotton reduced the pH to 8.21 from 9.43 with reduction efficiency of 12.9% (Mustafa & Asmatulu 2020).

Turbidity of the solution depends upon the presence of a large number of suspended solids, which results in cloudiness of the solution. Turbidity is also one of the parameters that define the quality of water. Quality of water is inversely proportional to the value of turbidity. The turbidity of drinking water should not exceed 5 NTU (Giroto *et al.* 2015). In this study the effect of food waste activated carbon on turbidity reduction of biodiesel wash water was also explored. From the results (Table 3), it is evident that the turbidity of the wash water reduced to 1 NTU from 63 NTU for the activated carbon produced from mixed food waste (MFW). The turbidity reduction efficiency was 98.41%. The turbidity of the wash water obtained after treatment with activated carbon produced from other wastes (WCVR, MFPW, WCR) was also reduced to 1 NTU respectively. Recently, ZnCl<sub>2</sub> incorporated activated carbon (3.2 g) produced treated water of 1.8 NTU from an effluent of 147 NTU with reduction efficiency of 98.77% after removal of 147 NTU turbidity showing 98.77% efficiency (Giroto *et al.* 2015).

It is evident from Table 3, that the COD of the wash water was reduced to 88 mg/L with activated carbon produced from MFW. The COD reduction efficiency was 41.33%. The COD of the wash water treated with activated carbon produced from other wastes (WCVR, MFPW, WCR) were 91, 84 and 89 mg/L, respectively. The oil and grease was reduced to 0.952 mg/L from 98 mg/L under the optimum adsorption conditions when MFW activated carbon was used. The removal efficiency of activated carbon with respect to oil and grease was found comparable at 99.5% (Santos *et al.* 2020). The activated carbon

produced from other waste (WCVR, MFPW, WCR) also proved effective in oil and grease reduction to 0.938, 0.925 and 0.926, respectively.

#### 4. CONCLUSION

As outcomes of this study, the fixed carbon percentages of MFW samples were found to be between 22 and 23% which shows the applicability of MFW samples for the synthesis of  $\text{ZnCl}_2$  activated carbon nanomaterial as evident from the FESEM data indicating nanoparticles of 44.87 nm. The uniform pore mesoporous distribution surface of  $\text{ZnCl}_2$  activated adsorbent was been observed under FESEM analysis, and is an important factor required for the use of activated carbon in water treatment. The  $\text{ZnCl}_2$  activated food waste carbon proved effective in treating biodiesel wash water as it reduced the pH to neutral, turbidity to 1 NTU, COD to 88 mg/L and oil and grease to 0.925, making the treated water suitable for reuse.

#### ACKNOWLEDGEMENTS

The authors thank the Ministry of Human Resource Development, Government of India for funding the research work (Award No. 5-5/2014-TS.VII 4 September 2014). The authors thank the Physics Department, Sathyabama Institute of Science and Technology for FT IR analysis and the Centre for Nanoscience and Nanotechnology Sathyabama Institute of Science and Technology for FESEM.

#### CONFLICT OF INTEREST

None.

#### DATA AVAILABILITY STATEMENT

All relevant data are included in the paper or its Supplementary Information.

#### REFERENCES

- Abdul-Hameed, H. M. & Al Juboury, M. F. 2020a MgFe-doubled layers hydroxide intercalated with low cost local adsorbent using for removal of lead from aqueous solution. *J. Water Land Dev.* **45** (IV–VI), 10–18. doi:10.24425/jwld.2020.133041.
- Abdul-Hameed, H. M. & Al Juboury, M. F. 2020b A novel coated of Mg/Fe layered double hydroxide on date palm stones. *IOP Conf. Ser.: Earth Environ. Sci.* **464**, 012003.
- Ahmaruzzaman, M. & Gupta, V. K. 2011 Rice husk and its ash as low-cost adsorbents in water and wastewater treatment. *Ind. Eng. Chem. Res.* **50**, 13589–13613.
- Azmi, N. B., Bashir, M. J. K., Sethupathi, S. & Ng, C. A. 2016 Anaerobic stabilized landfill leachate treatment using chemically activated sugarcane bagasse activated carbon: kinetic and equilibrium study. *Desalin. Water Treat.* **57**, 3916–3927.
- Bae, W., Kim, J. & Chung, J. 2014 Production of granular activated carbon from food-processing wastes (walnut shells and jujube seeds) and its adsorptive properties. *J. Air Waste Manage. Assoc.* **64**, 879–886.
- Baldev, E., Mubarakali, D., Saravanakumar, K., Arutselvan, C., Alharbi, N. S., Alharbi, S. A., Sivasubramanian, V. & Thajuddin, N. 2018 Unveiling algal cultivation using raceway ponds for biodiesel production and its quality assessment. *Renew. Energy* **123**, 486–498.
- Bashir, M. J. K., Aziz, H. A., Amr, S. S. A., Sethupathi, S. A. P., Ng, C. A. & Lim, J. W. 2015 The competency of various applied strategies in treating tropical municipal landfill leachate. *Desalin. Water Treat.* **54**, 2382–2395.
- Bashir, M. A., Thiri, M., Yang, X., Yang, Y. & Safdar, A. M. 2018 Purification of biodiesel via pre-washing of transesterified waste oil to produce less contaminated wastewater. *J. Clean. Prod.* **180**, 466–471.
- Chang, J. I., Tsai, J. J. & Wu, K. H. 2006 Thermophilic composting of food waste. *Bioresour. Technol.* **97**, 116–122.
- Chavalparit, O. & Ongwandee, M. 2009 Optimizing electrocoagulation process for the treatment of biodiesel wastewater using response surface methodology. *J. Environ. Sci.* **21** (11), 1491–1496.
- Chen, J., Fan, Y., Jiaqiang, E., Cao, W., Zhang, F., Gong, J., Liu, G. & Xu, W. 2019a Effects analysis on the gasification kinetic characteristics of food waste in supercritical water. *Fuel* **241**, 94–104.
- Chen, W.-H., Lin, Y.-Y., Liu, H.-C., Chen, T.-C., Hung, H.-C. & Chen, C.-H. 2019b Analysis of physicochemical properties of liquefaction bio-oil from food waste. *Energy Procedia* **158**, 61–66.
- Chingombe, P., Saha, B. & Wakeman, R. J. 2005 Surface modification and characterisation of a coal-based activated carbon. *Carbon N. Y.* **43**, 3132–3143.
- Cho, J. K., Park, S. C. & Chang, H. N. 1995 Biochemical methane potential and solid state anaerobic digestion of Korean food wastes. *Bioresour. Technol.* **52**, 245–253.

- Chung, Z. L., Tan, Y. H., San Chan, Y., Kansedo, J., Mubarak, N. M., Ghasemi, M. & Abdullah, M. O. 2019 Life cycle assessment of waste cooking oil for biodiesel production using waste chicken eggshell derived CaO as catalyst via transesterification. *Biocatal. Agric. Biotechnol.* **21**, 101317.
- Dabwan, A. H. A., Yuki, N., Asri, N. A. M., Katsumata, H., Suzuki, T. & Kaneco, S. 2015 Removal of methylene blue, rhodamine B and ammonium ion from aqueous solution by adsorption onto sintering porous materials prepared from coconut husk waste. *Open J. Inorg. Non-Met. Mater.* **5**, 21.
- Danish, M., Ahmad, T., Hashim, R., Said, N., Akhtar, M. N., Mohamad-Saleh, J. & Sulaiman, O. 2018 Comparison of surface properties of wood biomass activated carbons and their application against rhodamine B and methylene blue dye. *Surf. Interfaces* **11**, 1–13.
- Dhandapani, E., Duraisamy, N. & Raj, R. M. 2020 Green synthesis of carbon quantum dots from food waste. *Mater. Today Proc.* in press <https://doi.org/10.1016/j.matpr.2020.10.025>
- Dizbay-Onat, M., Vaidya, U. K., Balanay, J. A. G. & Lungu, C. T. 2018 Preparation and characterization of flax, hemp and sisal fiber-derived mesoporous activated carbon adsorbents. *Adsorpt. Sci. Technol.* **36**, 441–457.
- Enaïme, G., Ennaciri, K., Ounas, A., Baçaoui, A., Seffen, M., Selmi, T. & Yaacoubi, A. 2017 Preparation and characterization of activated carbons from olive wastes by physical and chemical activation: application to Indigo carmine adsorption. *J. Mater. Environ. Sci.* **8**, 4125–4137.
- Giroto, F., Alibardi, L. & Cossu, R. 2015 Food waste generation and industrial uses: a review. *Waste Manag.* **45**, 32–41.
- Guan, B. T. H., Latif, P. A. & Yap, T. Y. H. 2013 Physical preparation of activated carbon from sugarcane bagasse and corn husk and its physical and chemical characteristics. *Int. J. Eng. Res. Sci. Technol.* **2**, 1–14.
- Halim, A. A., Aziz, H. A., Johari, M. A. M., Ariffin, K. S. & Bashir, M. J. K. 2012 Semi-aerobic landfill leachate treatment using carbon–minerals composite adsorbent. *Environ. Eng. Sci.* **29**, 306–312.
- Inbaraj, B. S., Sridhar, K. & Chen, B.-H. 2021 Removal of polycyclic aromatic hydrocarbons from water by magnetic activated carbon nanocomposite from green tea waste. *J. Hazard. Mater.* **415**, 125701.
- Jaria, G., Calisto, V., Silva, C. P., Gil, M. V., Otero, M. & Esteves, V. I. 2019 Obtaining granular activated carbon from paper mill sludge—A challenge for application in the removal of pharmaceuticals from wastewater. *Sci. Total Environ.* **653**, 393–400.
- Joshi, V. K. 2002 Food processing industries' waste: opportunities, technologies, challenges and future strategies. In: *Biotechnology in Agriculture and Environment* (J. K. Arora, S. S. Marwaha & R. Grover, eds). New Delhi: Asiatech Publishers Inc., pp. 129–148.
- Kosheleva, R. I., Mitropoulos, A. C. & Kyzas, G. Z. 2019 Synthesis of activated carbon from food waste. *Environ. Chem. Lett.* **17**, 429–438.
- Kumar, A. & Jena, H. M. 2016 Preparation and characterization of high surface area activated carbon from Fox nut (*Euryale ferox*) shell by chemical activation with H<sub>3</sub>PO<sub>4</sub>. *Results Phys.* **6**, 651–658.
- Li, H., Zhou, S., Sun, Y. & Feng, P. 2009 Advanced treatment of landfill leachate by a new combination process in a full-scale plant. *J. Hazard. Mater.* **172**, 408–415.
- Mahamad, M. N., Zaini, M. A. A. & Zakaria, Z. A. 2015 Preparation and characterization of activated carbon from pineapple waste biomass for dye removal. *Int. Biodeter. Biodegr.* **102**, 274–280.
- Mokhtar, M. F., Latif, E. H. A., Sufian, S. & Shaari, K. Z. K. 2013 Preparation of activated carbon from durian shell and seed. *Adv. Mater. Res.* **626**, 887–891.
- MubarakAli, D. 2019 Microwave irradiation mediated synthesis of needle-shaped hydroxyapatite nanoparticles as a flocculant for *Chlorella vulgaris*. *Biocatal. Agric. Biotechnol.* **17**, 203–206.
- Mustafa, R. & Asmatulu, E. 2020 Preparation of activated carbon using fruit, paper and clothing wastes for wastewater treatment. *J. Water Process Eng.* **35**, 101239.
- Nirmala, N., Dawn, S. S. & Harindra, C. 2020 Analysis of performance and emission characteristics of waste cooking oil and *Chlorella variabilis* MK039712.1 biodiesel blends in a single cylinder, four strokes diesel engine. *Renew. Energy* **147**, 284–292.
- Pandey, B. K., Vyas, S., Pandey, M. & Gaur, A. 2016 Municipal solid waste to energy conversion methodology as physical, thermal, and biological methods. *Curr. Sci. Perspect* **2**, 39–44.
- Pitakpoolsil, W. & Hunsom, M. 2013 Adsorption of pollutants from biodiesel wastewater using chitosan flakes. *J. Taiwan Inst. Chem. Eng.* **44** (6), 963–971.
- Poornapushpakala, S., Dawn, S. S., Govind, M. A., Santhosh, A., Nirmala, N., Barani, S. & Nirmala, M. 2021 A novel image processing technique to evaluate biodiesel wastewater for recovery, recycle and reuse towards zero liquid discharge approach. *Biocatal. Agric. Biotechnol.* **31**, 101874.
- Rajbhandari, R., Shrestha, L. K. & Pradhananga, R. R. 2012 Nanoporous activated carbon derived from Lapsi (*Choerospondias Axillaris*) seed stone for the removal of arsenic from water. *J. Nanosci. Nanotechnol.* **12**, 7002–7009.
- Ramakrishnan, K. & Namasivayam, C. 2009 Development and characteristics of activated carbons from Jatropha husk, an agro industrial solid waste, by chemical activation methods. *J. Environ. Eng. Manag.* **19**, 173–178.
- Ranjan, A., Dawn, S. S., Jayaprabakar, J., Nirmala, N., Saikiran, K. & Sriram, S. S. 2018 Experimental investigation on effect of MgO nanoparticles on cold flow properties, performance, emission and combustion characteristics of waste cooking oil biodiesel. *Fuel* **220**, 780–791.
- Saka, C. 2012 BET, TG–DTG, FT-IR, SEM, iodine number analysis and preparation of activated carbon from acorn shell by chemical activation with ZnCl<sub>2</sub>. *J. Anal. Appl. Pyrolysis* **95**, 21–24.

- Santos, T. M., de Jesus, F. A., da Silva, G. F. & Pontes, L. A. M. 2020 Synthesis of activated carbon from *Oleifera moringa* for removal of oils and greases from the produced water. *Environ. Nanotechnol. Monit. Manag.* **14**, 100357.
- Saqib, N. U., Baroutian, S. & Sarmah, A. K. 2018 Physicochemical, structural and combustion characterization of food waste hydrochar obtained by hydrothermal carbonization. *Bioresour. Technol.* **266**, 357–363.
- Saygılı, H., Güzel, F. & Önal, Y. 2015 Conversion of grape industrial processing waste to activated carbon sorbent and its performance in cationic and anionic dyes adsorption. *J. Clean. Prod.* **93**, 84–93.
- Tavill, G. 2020 Industry challenges and approaches to food waste. *Physiol. Behav.* **223**, 112993.
- Tran, H. N., Chao, H.-P. & You, S.-J. 2018 Activated carbons from golden shower upon different chemical activation methods: synthesis and characterizations. *Adsorpt. Sci. Technol.* **36**, 95–113.
- Tucho, G. T. & Okoth, T. 2020 Evaluation of neglected bio-wastes potential with food-energy-sanitation nexus. *J. Clean. Prod.* **242**, 118547.
- Wong, S., Ngadi, N., Inuwa, I. M. & Hassan, O. 2018 Recent advances in applications of activated carbon from biowaste for wastewater treatment: a short review. *J. Clean. Prod.* **175**, 361–375.
- Yagmur, E., Ozmak, M. & Aktas, Z. 2008 A novel method for production of activated carbon from waste tea by chemical activation with microwave energy. *Fuel* **87**, 3278–3285.
- Yalcın, N. & Sevinc, V. 2000 Studies of the surface area and porosity of activated carbons prepared from rice husks. *Carbon N. Y.* **38**, 1943–1945.
- Yang, Y., Lin, B., Sun, C., Tang, M., Lu, S., Huang, Q. & Yan, J. 2021 Facile synthesis of tailored mesopore-enriched hierarchical porous carbon from food waste for rapid removal of aromatic VOCs. *Sci. Total Environ.* **773**, 145453.
- Zięzio, M., Charmas, B., Jedynek, K., Hawryluk, M. & Kucio, K. 2020 Preparation and characterization of activated carbons obtained from the waste materials impregnated with phosphoric acid (V). *Appl. Nanosci.* **10**, 4703–4716.

First received 20 April 2021; accepted in revised form 19 July 2021. Available online 29 July 2021
